# Supplementary material for: Regulation of mitotic recombination between DNA repeats in centromeres
Source: PubMed Central journal article supplement — Nucleic Acids Res. 2017 Aug 29;45(19):11222–35. doi: 10.1093/nar/gkx763 (PMC5737691; doi:10.1093/nar/gkx763), 2017-08-29
Supplement: gkx763_supp.pdf [file gkx763_supp.pdf]

# **Regulation of mitotic recombination between DNA repeats in centromeres**

Faria Zafar, Akiko K. Okita, Atsushi T. Onaka, Jie Su, Yasuhiro Katahira,  
Jun-ichi Nakayama, Tatsuro S. Takahashi, Hisao Masukata and Takuro Nakagawa

**Supplementary Data**

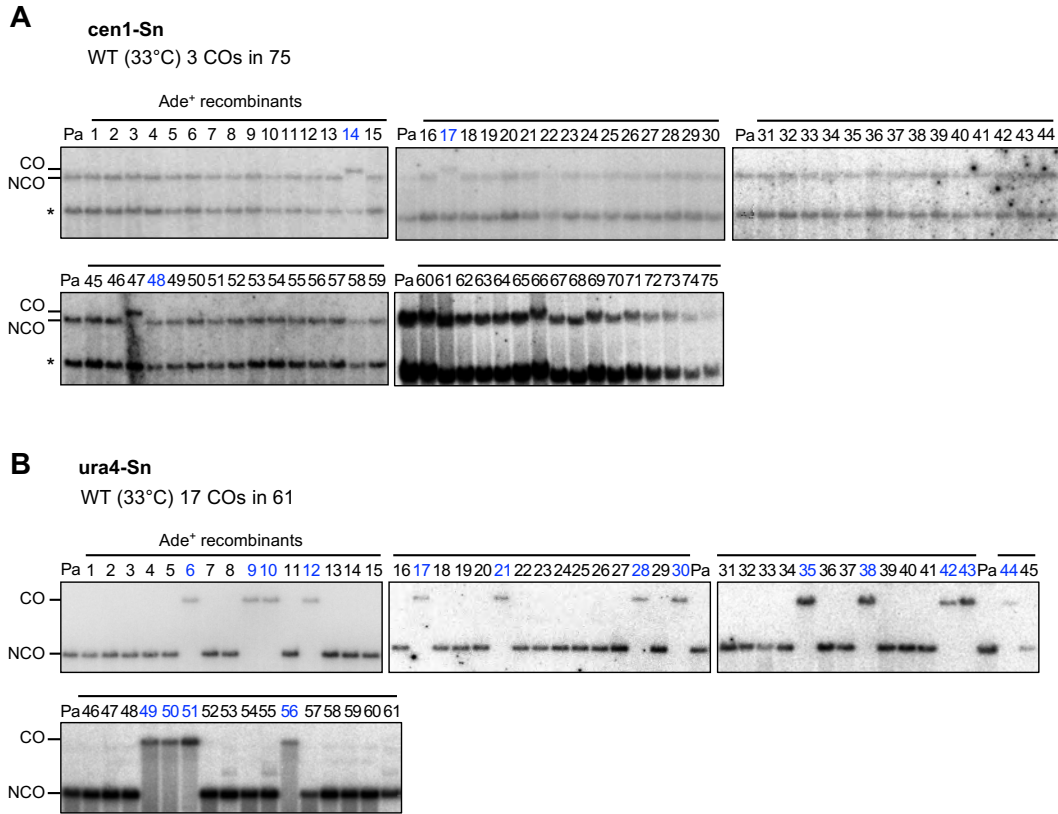

**Supplementary Figure S1.** Physical detection of crossover and non-crossover recombinants in the *cen1-Sn* and *ura4-Sn* constructs in wild type strains. (A) Crossover and non-crossover recombinants produced in the *cen1-Sn* construct in wild type (TNF3347). Southern hybridization of restriction fragments was carried out as described in Figure 2. (B) Crossover and non-crossover recombinants produced in the *ura4-Sn* construct in wild type (TNF3631). Crossovers are shown in blue. Pa, parental; \*, a band from *cnt3*. CO, crossover; NCO, non-crossovers.

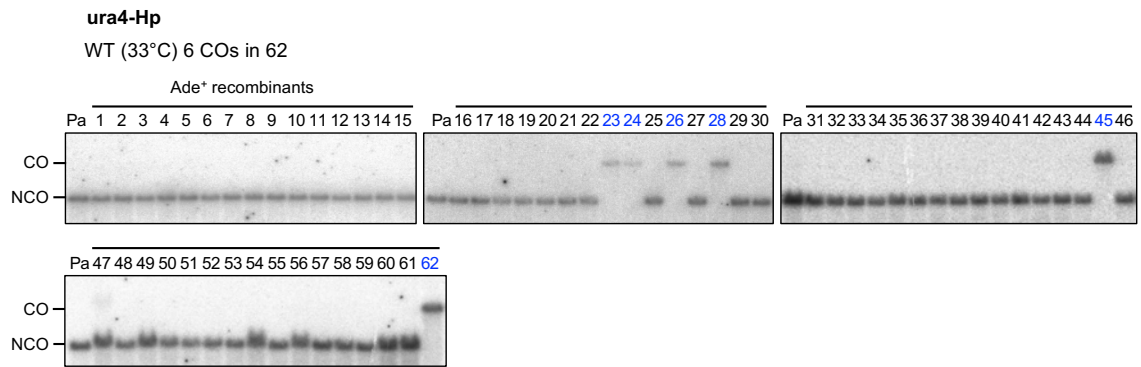

**Supplementary Figure S2.** Physical detection of crossovers and non-crossovers in the *ura4-Sn* construct in the wild type strain (TNF3650).

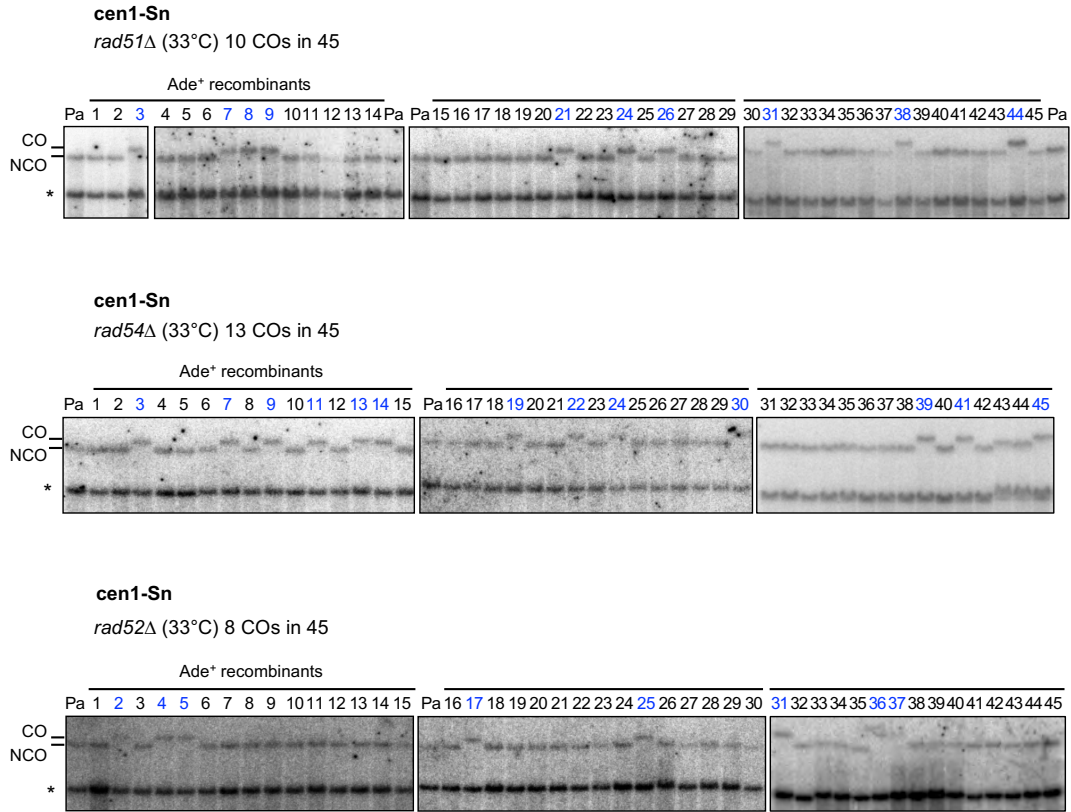

**Supplementary Figure S3.** Physical detection of crossovers and non-crossovers in the cen1-Sn construct in *rad51*Δ, *rad54*Δ, and *rad52*Δ strains (TNF3446, 3452, and 3459, respectively).

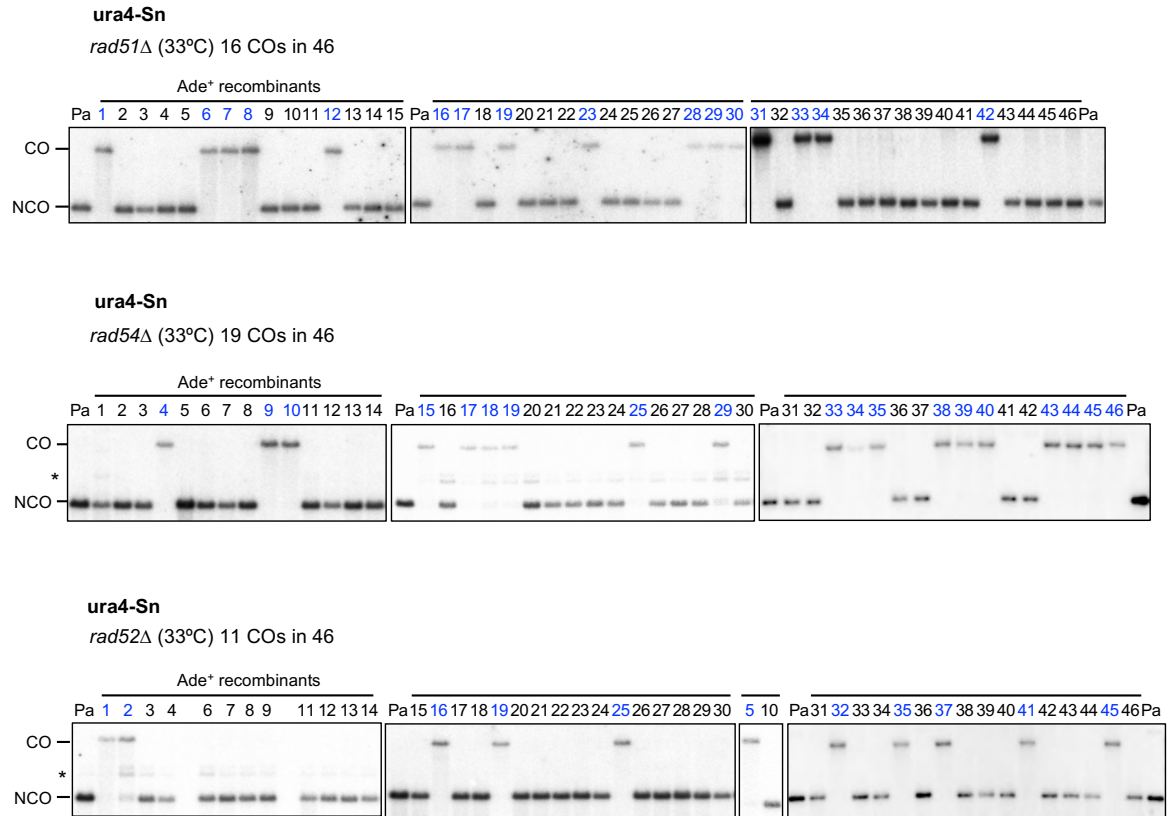

**Supplementary Figure S4.** Physical detection of crossovers and non-crossovers in the *ura4-Sn* construct in *rad51*Δ, *rad54*Δ, and *rad52*Δ strains (TNF3635, 3645, and 3643, respectively). \*, non-specific band.

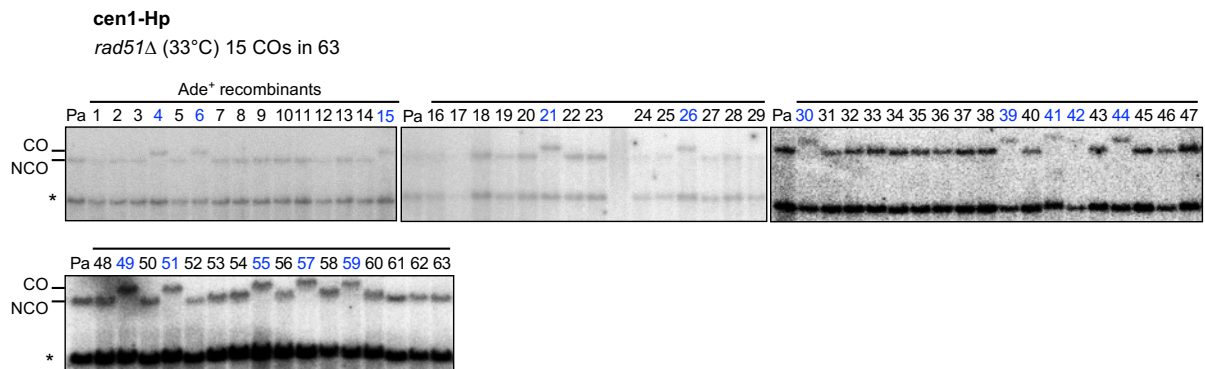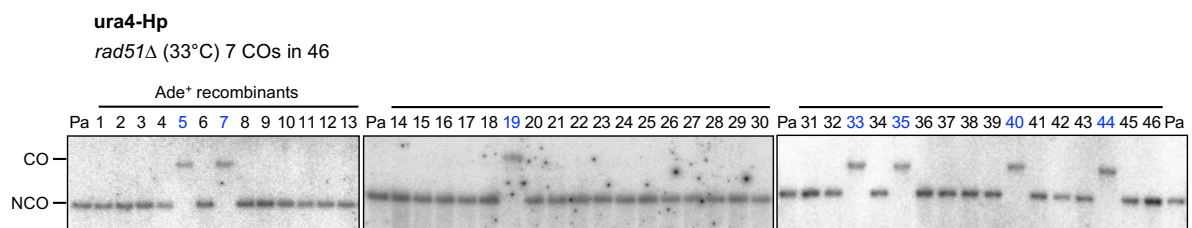

**Supplementary Figure S5.** Physical detection of crossovers and non-crossovers in the *cen1-Hp* and *ura4-Hp* constructs in the *rad51* $\Delta$  strains (TNF3257 and 3664, respectively).

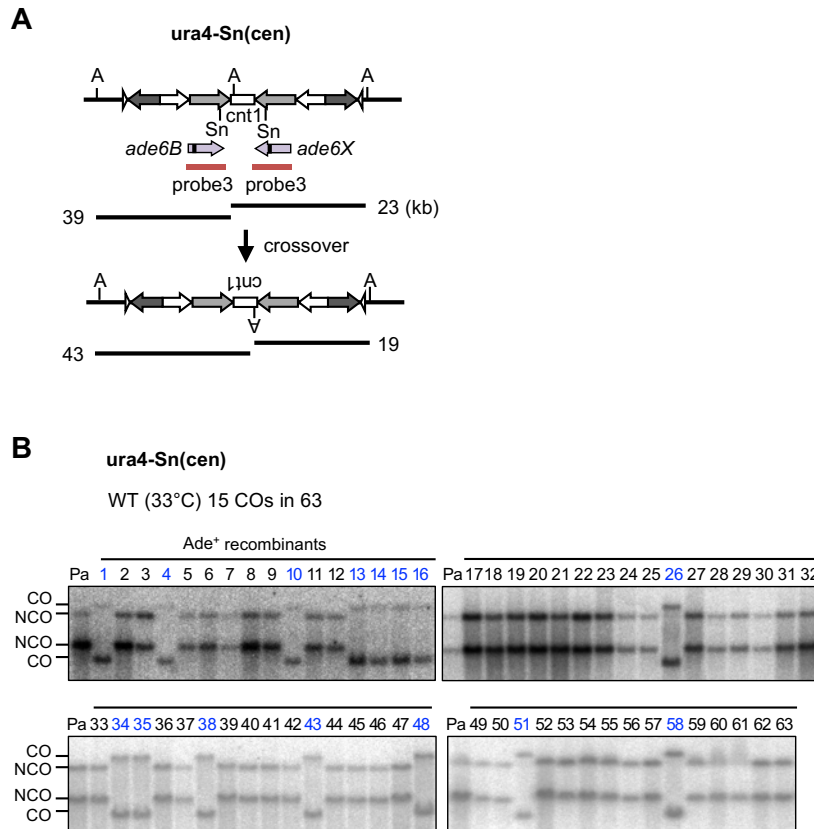

**Supplementary Figure S6.** Physical detection of crossovers and non-crossovers in the *ura4-Sn(cen)* construct in the wild type strain (TNF4684). (A) Illustrated is the *ura4-Sn(cen)* construct. Positions of centromere repeats, *AfeI* restriction sites, *probe3*, and the length of *AfeI* restriction fragments are indicated. *ade6B/X* were omitted in the bottom part of the illustration for simplicity. (B) Southern hybridization of *AfeI* restriction fragments using *probe3*.

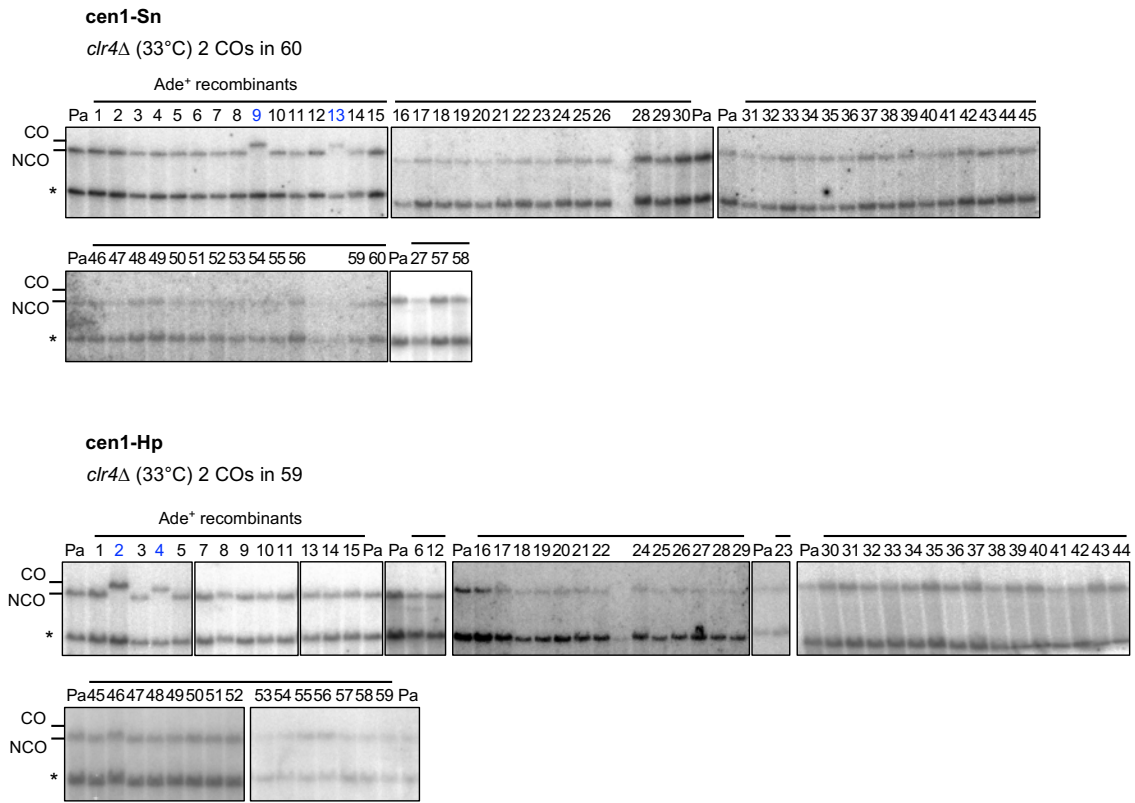

**Supplementary Figure S7.** Physical detection of crossovers and non-crossovers in the *cen1-Sn* and *cen1-Hp* constructs in the *clr4* mutants (TNF3734 and 3550, respectively).



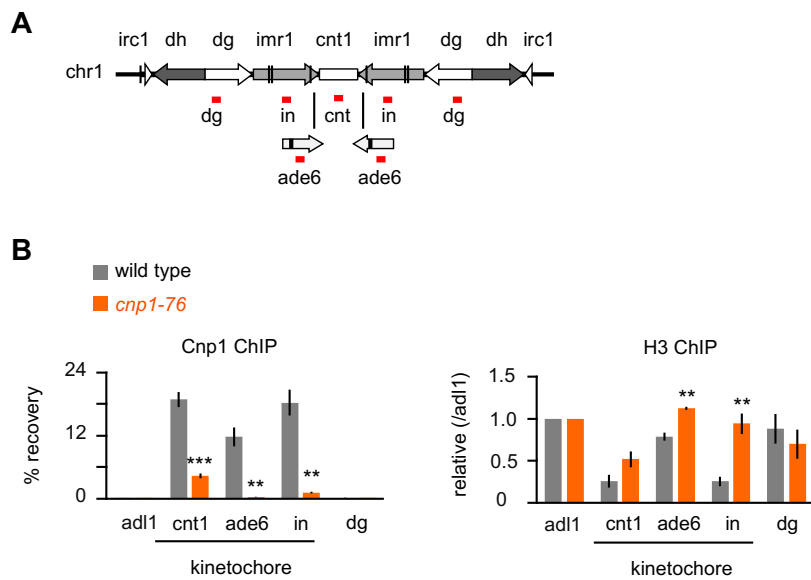

**Supplementary Figure S8.** The effect of the *cnp1-76* mutation on the localization of Cnp1 and histone H3 in centromeres. (A) Illustrated is the *cen1-Sn* construct. Positions of centromere repeats, *ade6B/X*, and the regions amplified by real-time PCR are shown. The *adl1* gene is present on the arm of chr2. (B) ChIP experiments were carried out using wild type and *cnp1-76* mutant strains (TNF3347 and 3736, respectively) grown at a semipermissive temperature of 30°C. Mean  $\pm$  SEM from three independent experiments are shown. \*\* $P < 0.01$ ; \*\*\* $P < 0.001$ .  $P$ -values were determined by the two-tailed student T-test.

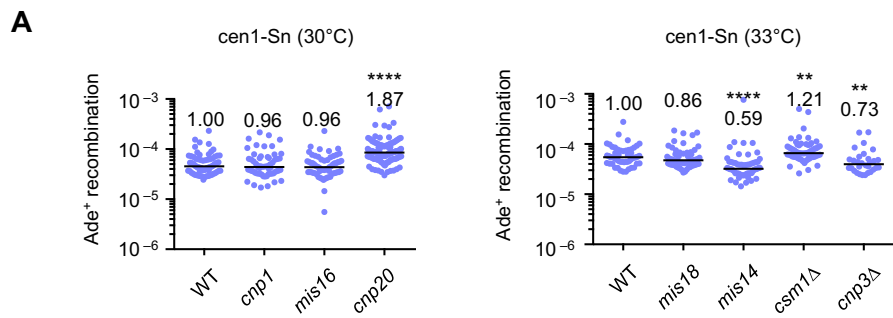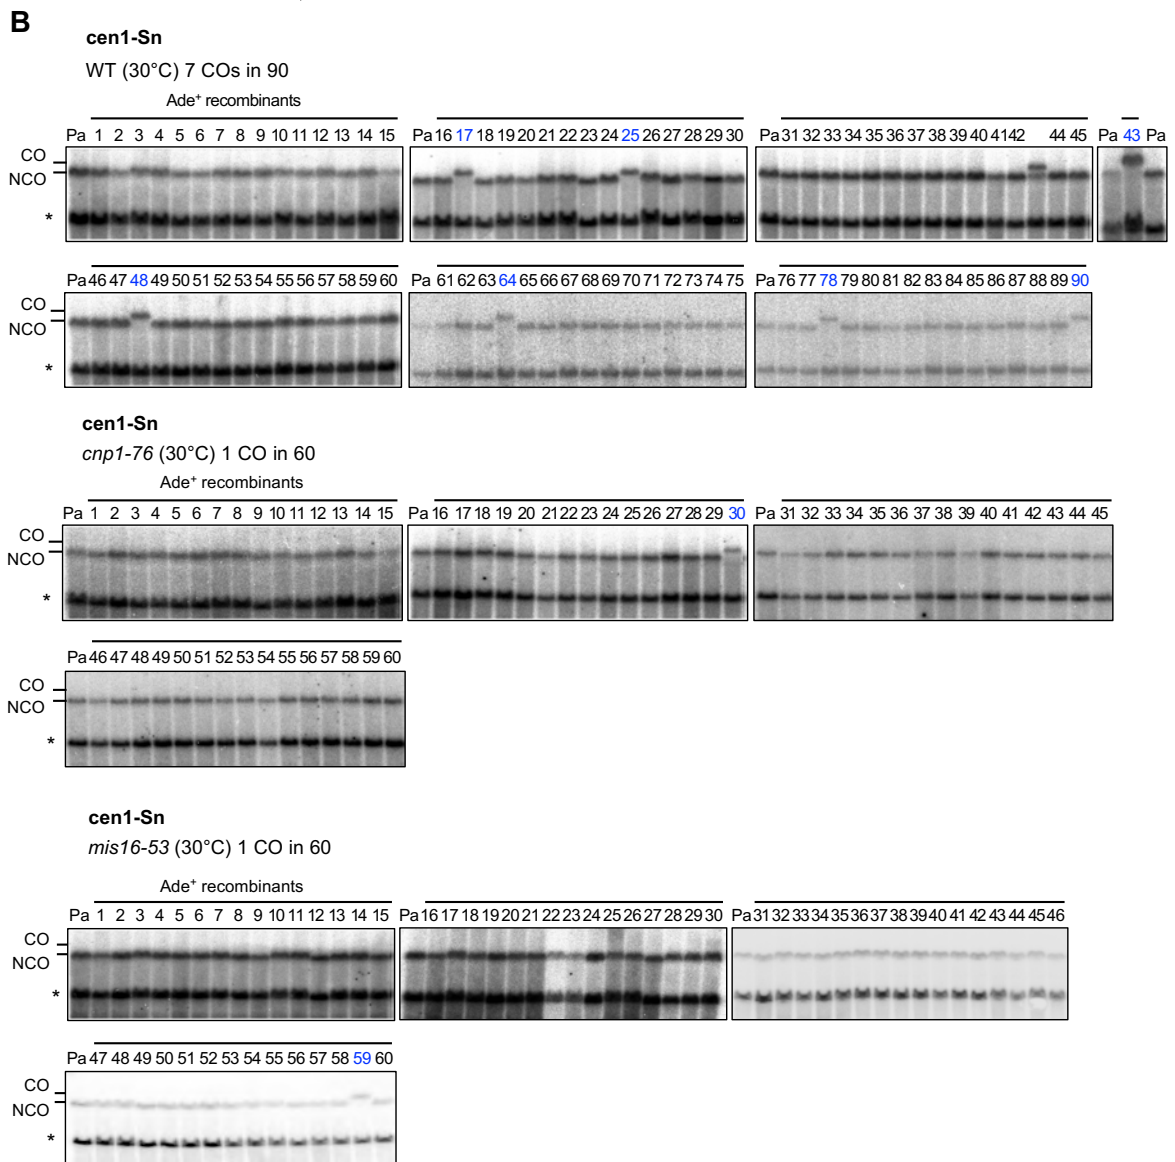

Supplementary Figure S9 (continued)

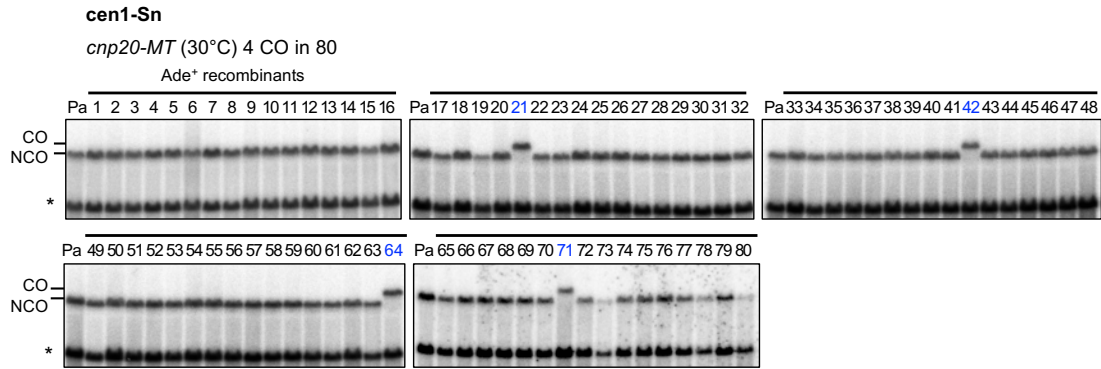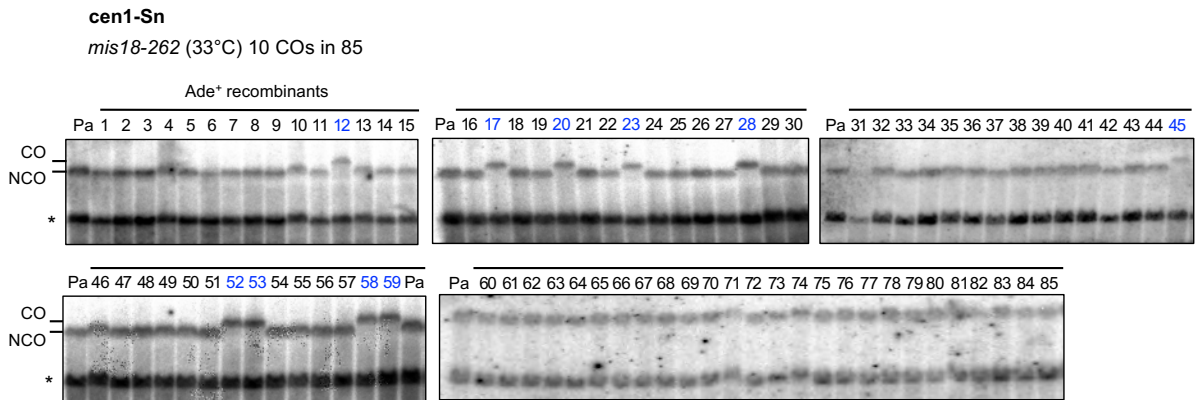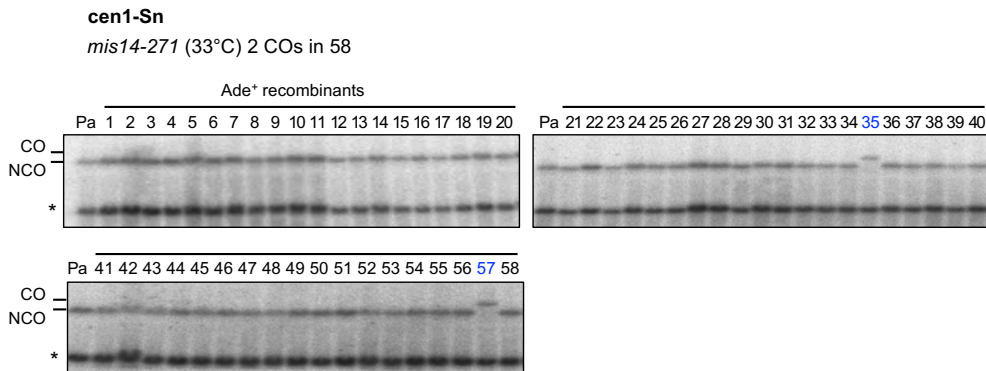

Supplementary Figure S9 (continued)

**cen1-Sn**

*csm1* $\Delta$  (33°C) 5 CO in 59

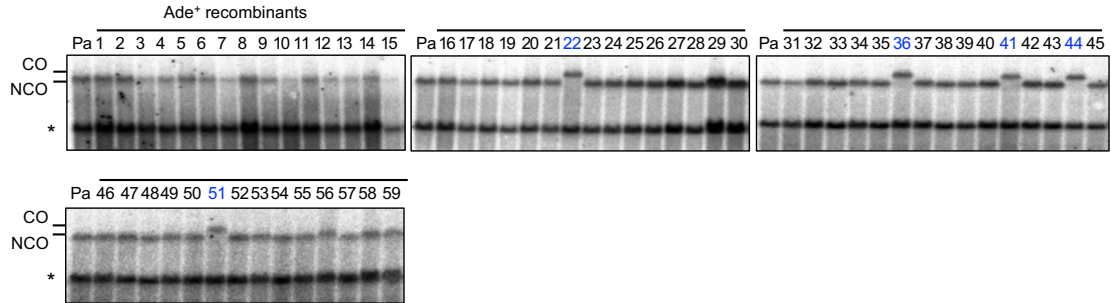

**cen1-Sn**

*cnp3* $\Delta$  (33°C) 1 CO in 30

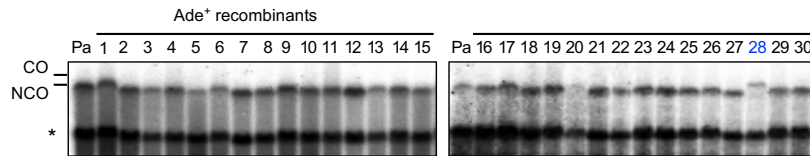

**cen1-Sn**

WT (28°C) 4 COs in 59

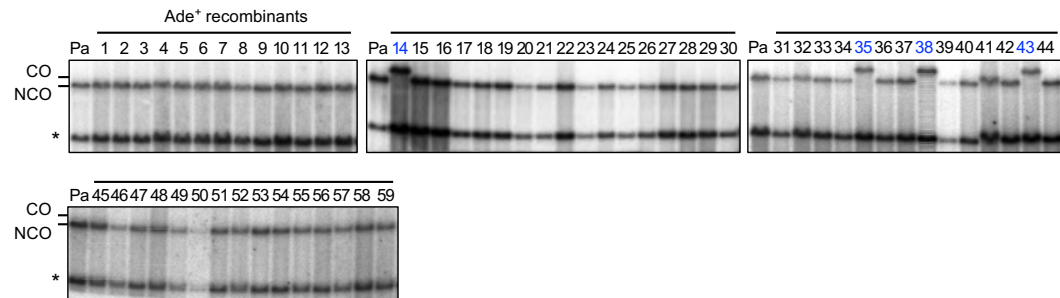

**cen1-Sn**

*mhf1* $\Delta$  (28°C) 16 COs in 61

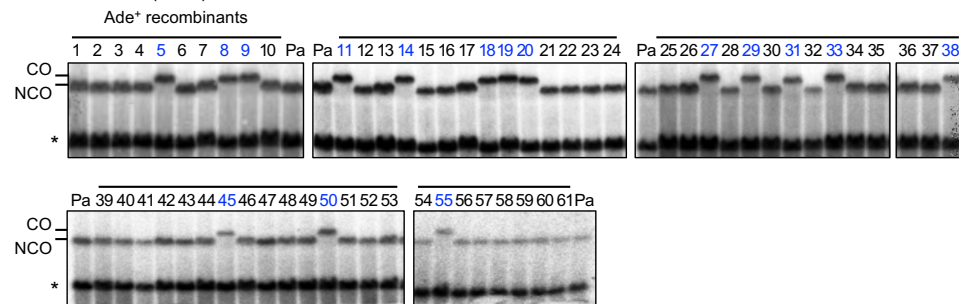

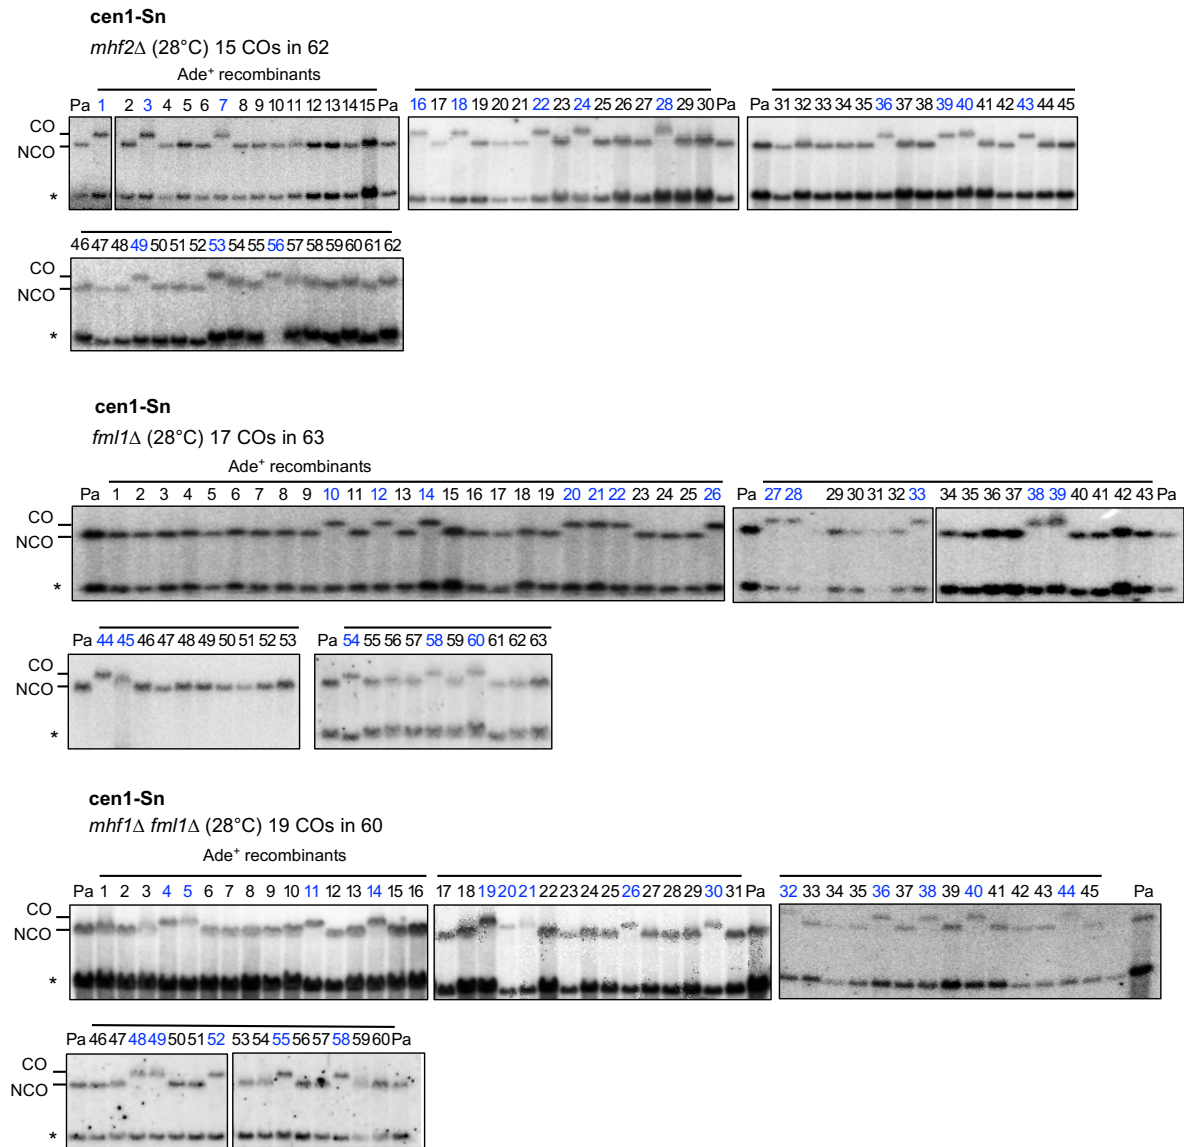

**Supplementary Figure S9.** The effect of mutations of the centromere protein on crossovers and non-crossovers in the *cen1-Sn* construct. (A) Recombination rates in wild type, *cnp1-76*, *mis16-53*, and *cnp20-M447T* strains (TNF3347, 3736, 4656, and 5534, respectively) at 30°C as well as those in wild type, *mis18-262*, *mis14-271*, *csn1*Δ, and *cnp3*Δ (TNF3347, 4657, 5376, 4139, and 4115, respectively) at 33°C. Lines indicate medians. Rates relative to the wild-type value are indicated at the top of each column. *P*-values were determined by the two-tailed Mann-Whitney test. \*\*\*\**P* < 0.0001. (B) Physical detection of crossovers and non-crossovers in the *cen1-Sn* construct in wild type, *cnp1-76*, *mis16-53*, and *cnp20-M447T* strains at 30°C; *mis18-262*, *mis14-271*, *csn1*Δ, and *cnp3*Δ strains at 33°C; wild type, *mhf1*Δ, *mhf2*Δ, *fml1*Δ, and *mhf1*Δ *fml1*Δ (T1NF3347, 4779, 5082, 5353, and 5128, respectively) at 28°C.

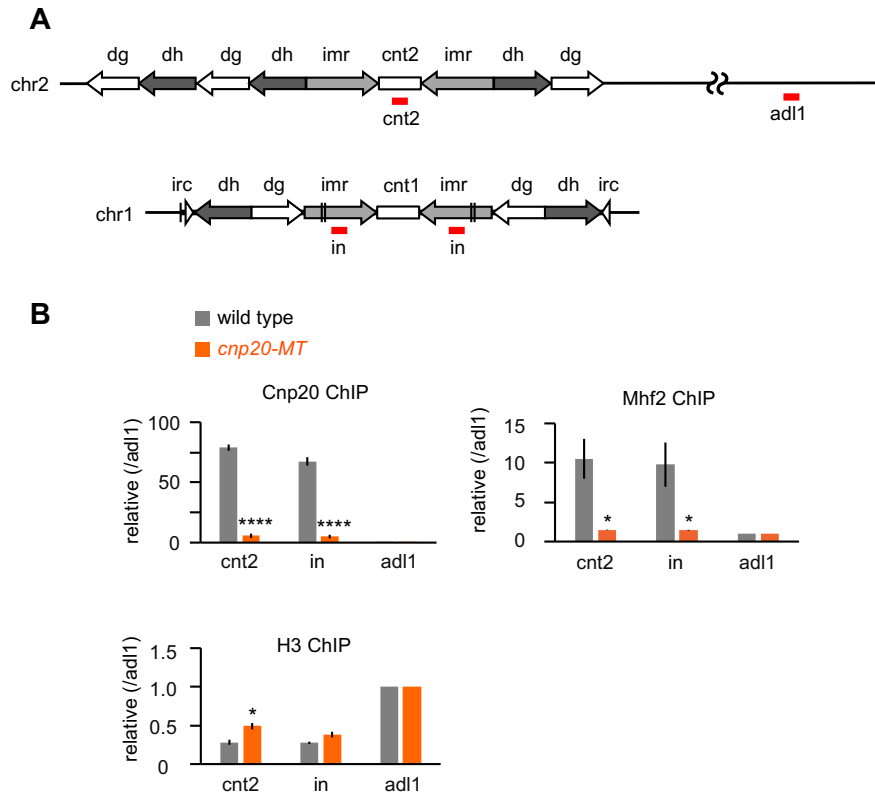

**Supplementary Figure S10.** The effect of *cnp20-M447T* mutation on the localization of Cnp20, Mhf2, and histone H3 in centromeres. The *cnp20-M447T* mutation changes methionine at 447 of Cnp20/CENP-T to threonine. The *cnp20-M447T* temperature-sensitive mutant was created by the PCR-based mutagenesis of the histone-fold domain of Cnp20. (A) Illustrated are cen1 and cen3. Positions of centromere repeats and the regions that were amplified by real-time PCR are indicated. (B) ChIP experiments were carried out using wild type and *cnp20-MT* mutant strains (TNF35 and 5485, respectively) grown at a semipermissive temperature of 30°C. Mean  $\pm$  SEM from three independent experiments are shown. *P*-values were determined by the two-tailed student T-test.

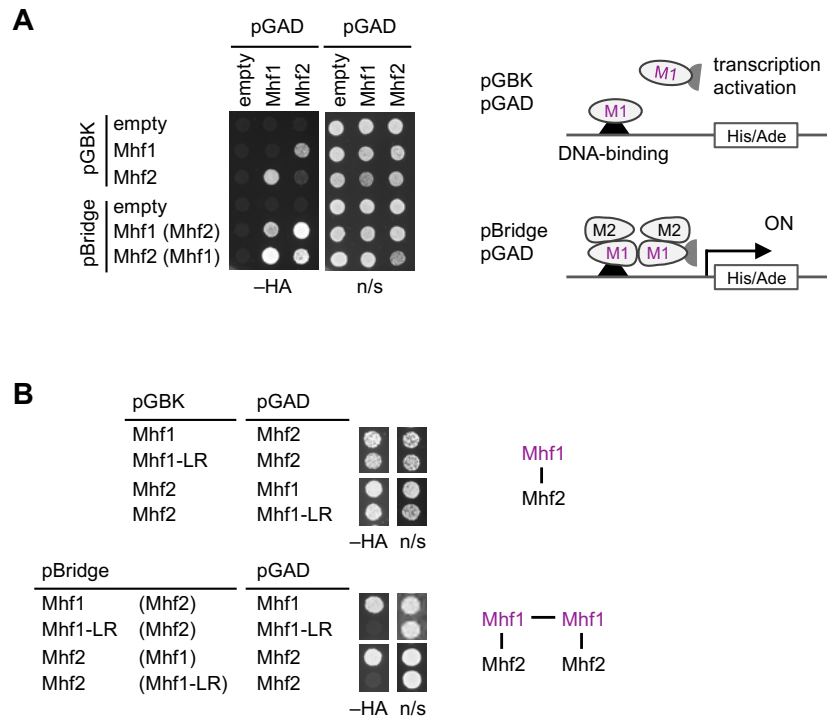

**Supplementary Figure S11.** Yeast two-hybrid (Y2H) assays to examine Mhf1-Mhf2 dimer and (Mhf1-Mhf2)<sub>2</sub> tetramer formation. Interaction between a pair of fusion proteins that contain a DNA-binding domain or a transcription activation domain allows expression of *HIS3* and *ADE2* reporter genes. Budding yeast cells expressing a pair of fusion proteins were spotted on selective (-HA) and non-selective (n/s) plates. (A) Y2H interaction was observed between Mhf1-Mhf2 but not between the same two subunits (upper half). Consistent with (Mhf1-Mhf2)<sub>2</sub> tetramer formation, however, Mhf1-Mhf1 interaction was detected when Mhf2 was additionally expressed from the pBridge plasmid (lower half). Similarly, Mhf2-Mhf2 interaction was detected when Mhf1 was additionally expressed. Depicted is the interaction between Mhf1 and Mhf1 that is only detected in the presence of Mhf2. Additional non-fusion proteins expressed from pBridge are shown in parentheses. (B) Effects of *mhf1-L78R* mutation on the Y2H interaction among Mhf1 and Mhf2. *mhf1-LR* did not affect Mhf1-Mhf2 interaction (the upper half) but abolished Mhf1-Mhf1 and Mhf2-Mhf2 interaction in the presence of Mhf2 and Mhf1, respectively (lower half). These data suggest that *mhf1-L78R* specifically impairs (Mhf1-Mhf2)<sub>2</sub> tetramer but not Mhf1-Mhf2 dimer formation.

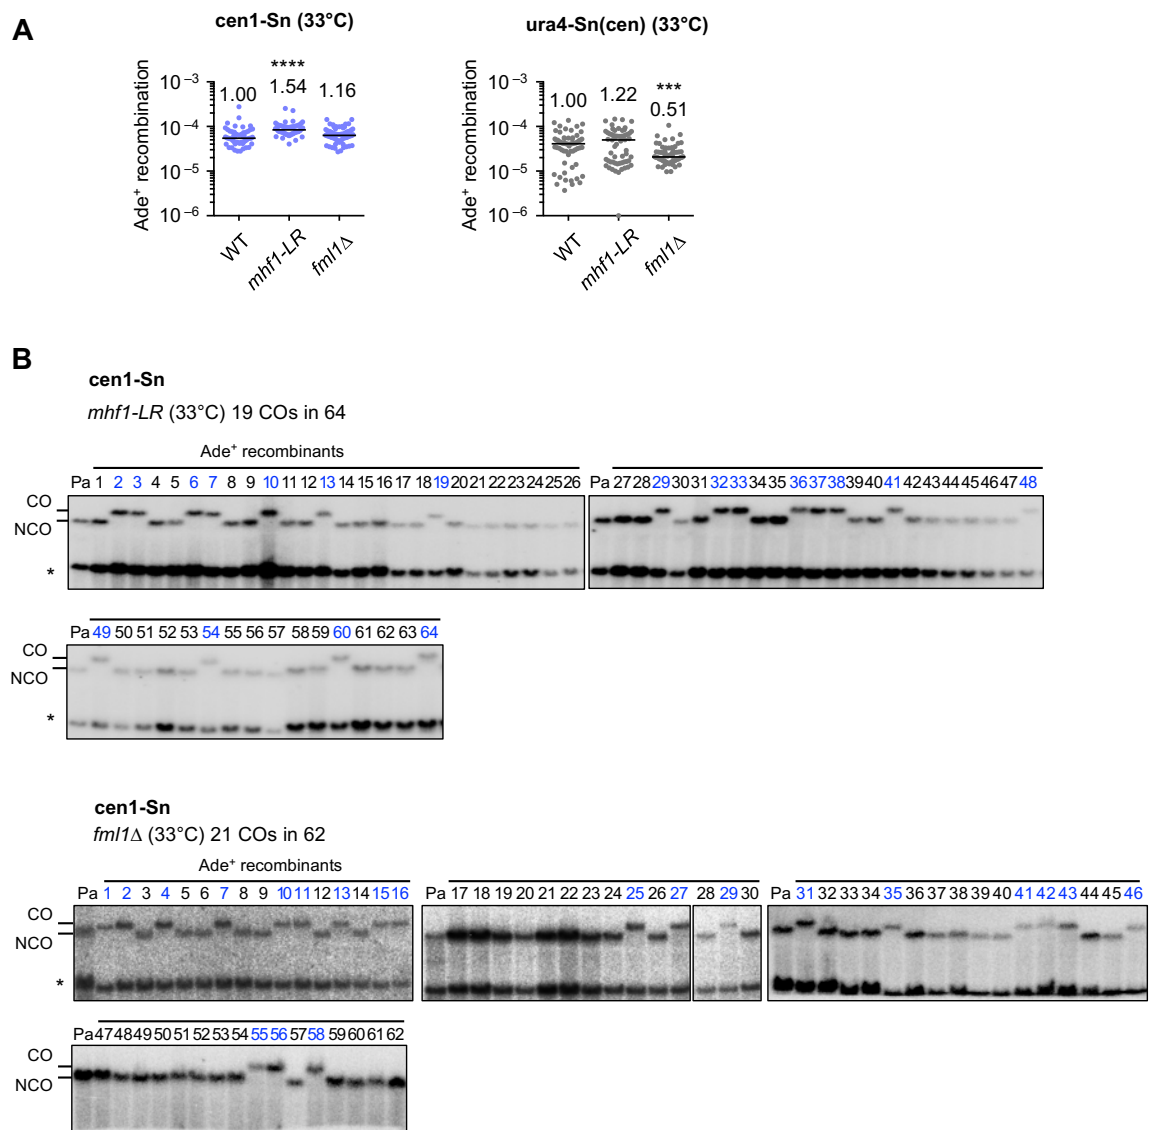

Supplementary Figure S12 (continued)



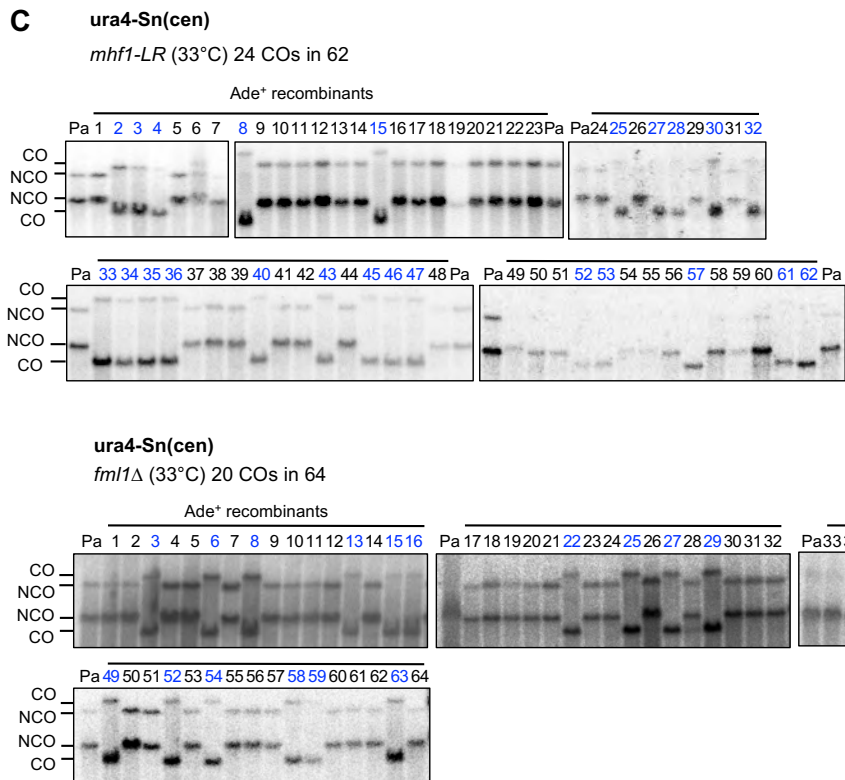

**Supplementary Figure S12.** Crossovers and non-crossovers in the *mhf1-L78R* and *fml1Δ* mutants. (A) Recombination rates in the *cen1-Sn* construct in wild type, *mhf1-LR*, and *fml1Δ* strains (TNF3347, 5444, and 5353, respectively) and in the *ura4-Sn(cen)* construct in wild type, *mhf1-LR*, and *fml1Δ* strains (TNF4684, 5455, and 4806, respectively). (B) Physical detection of crossovers and non-crossovers in the *cen1-Sn* construct in the *mhf1-LR* and *fml1Δ* mutants. (C) Physical detection of crossovers and non-crossovers in the *ura4-Sn(cen)* construct in the *mhf1-LR* and *fml1Δ* mutants.

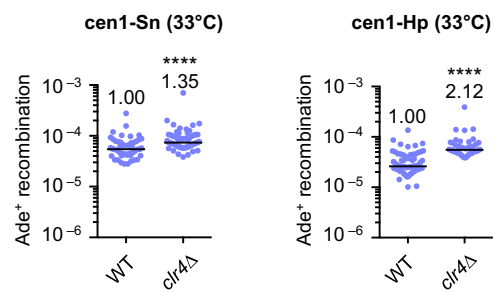

**Supplementary Figure S13.** A *clr4* deletion increases the recombination rate in centromeres. Recombination rates were determined in the *cen1-Sn* construct in wild type and *clr4*Δ strains (TNF3347 and 3734, respectively) as well as in the *cen1-Hp* construct in wild type and *clr4*Δ strains (TNF3144 and 3550, respectively).

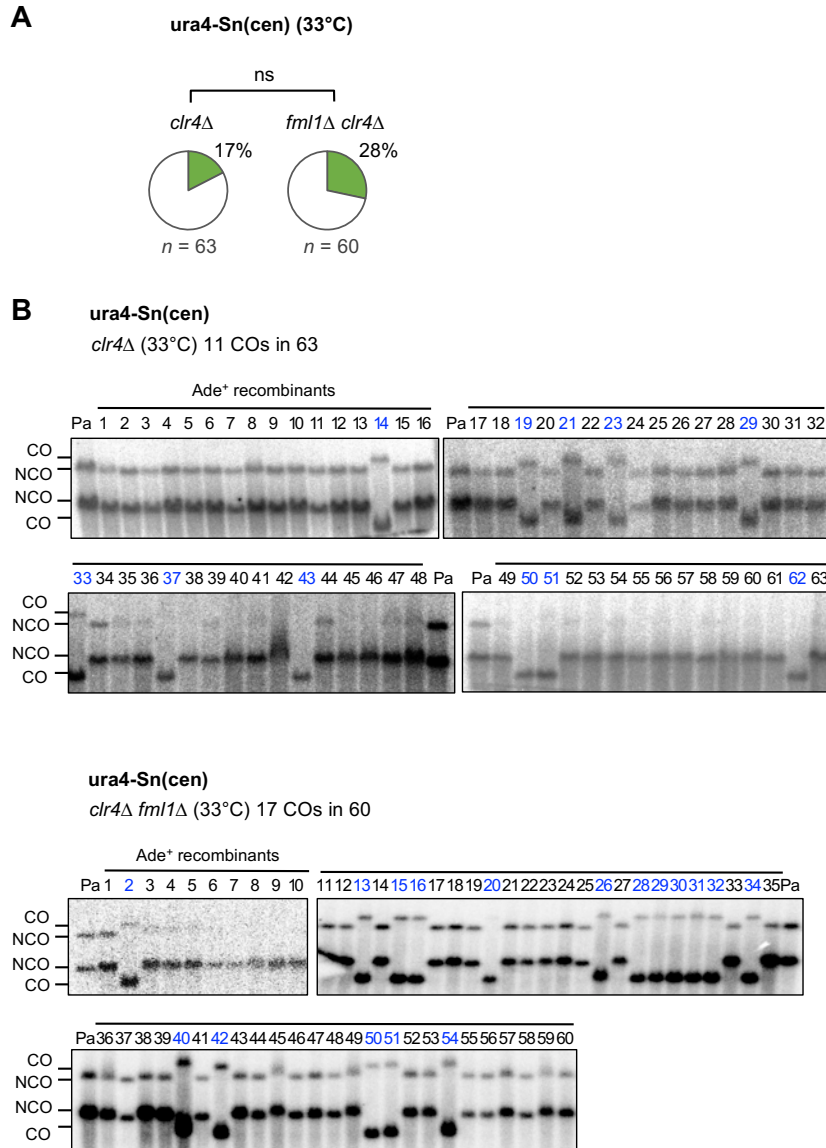

**Supplementary Figure S14.** Crossovers and non-crossovers in the *ura4-Sn(cen)* construct in the *clr4*Δ and *fml1*Δ*clr4*Δ mutants. (A) Proportions of crossovers in *clr4*Δ and *clr4*Δ*fml1*Δ mutants (TNF5281 and 5464, respectively) are indicated in pie charts. *P*-values were obtained by the two-tailed Fisher's exact test. *n*, sample number; ns, statistically non-significant. (B) Physical detection of crossovers and non-crossovers in the *clr4*Δ and *clr4*Δ *fml1*Δ mutants.

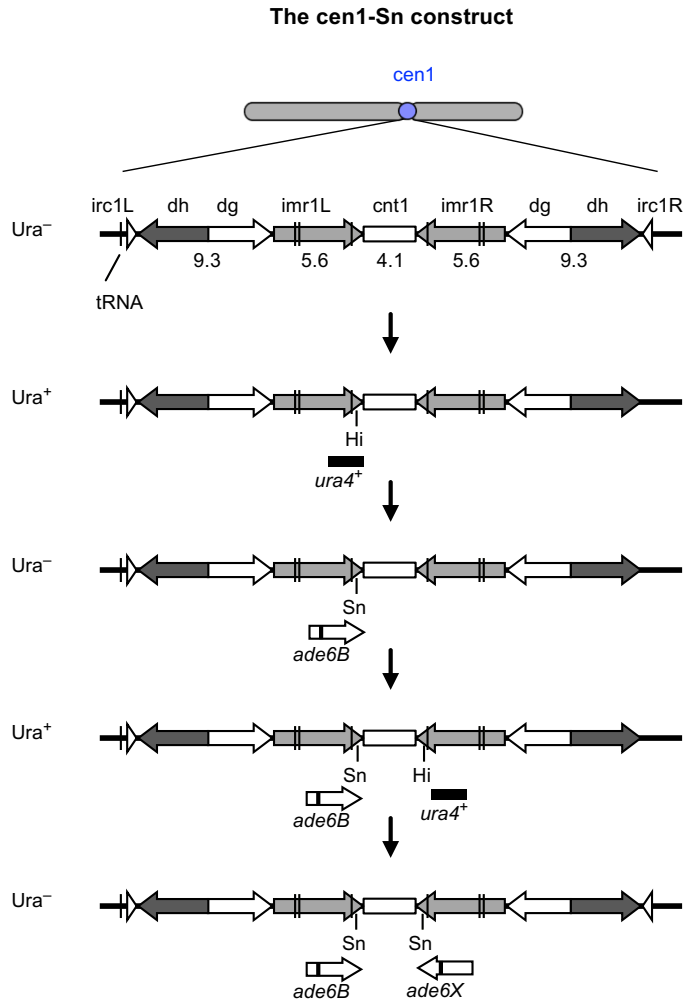

**Supplementary Figure S15.** Creation of the cen1-Sn construct. *ade6B* and *ade6X* heteroalleles were introduced at each side of *imr* repeats by a series of transformation. The *ura4*<sup>+</sup> gene was introduced at the Hi site in *imr1L*. Then, the *ura4*<sup>+</sup> gene was replaced by the DNA fragment containing the *ade6B* gene at the Sn site. Similarly, the *ura4*<sup>+</sup> gene was introduced at the Hi site in *imr1R*. The *ura4*<sup>+</sup> gene was then replaced by the DNA fragment containing the *ade6X* gene at the Sn site. Hi, HindIII; Sn, SnaBI.

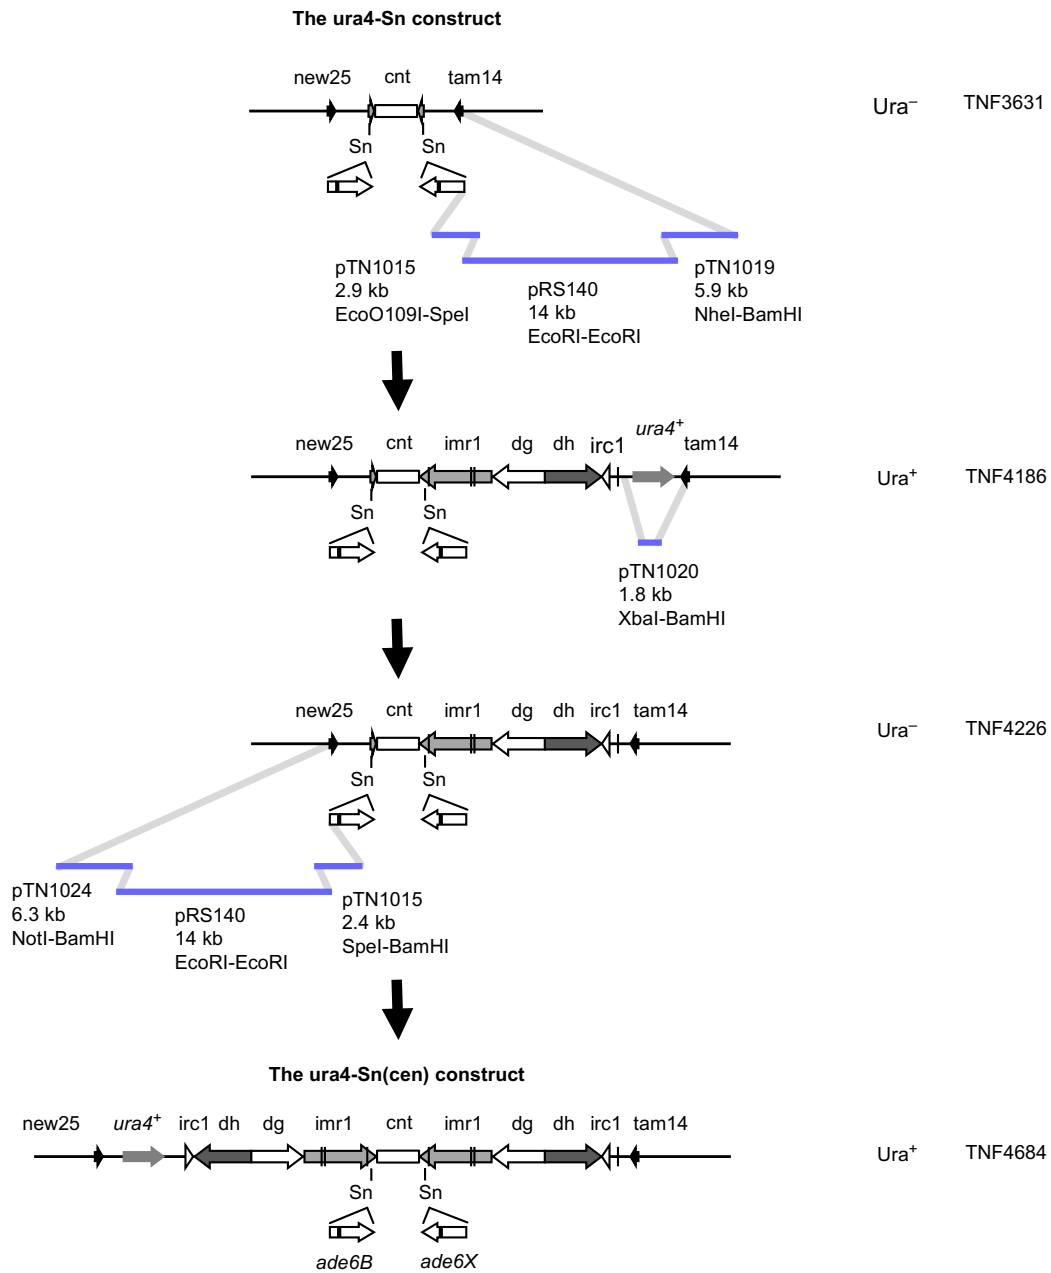

**Supplementary Figure S16.** Generation of the *ura4*-Sn(*cen*) construct. To introduce the entire *cen1* sequence into the *ura4* locus, a series of transformations of the *ura4*-Sn strain (TNF3631) was carried out. The DNA fragments used in the yeast transformation are indicated as blue bars. The right side of *cen1* and the *ura4*<sup>+</sup> gene were introduced at the *ura4* locus. After removal of the *ura4*<sup>+</sup> gene, the left side of *cen1* and the *ura4*<sup>+</sup> gene were introduced at the *ura4* locus.

Supplementary Table S1. Fission yeast strains used in this study.

| strain  | genotype                                                                                                                                                   |
|---------|------------------------------------------------------------------------------------------------------------------------------------------------------------|
| TNF3347 | <i>h+</i> , <i>ade6Δ-D</i> , <i>imr1L(Sn:ade6B)</i> , <i>imr1R(Sn:ade6X)</i>                                                                               |
| TNF3446 | <i>h+</i> , <i>ade6Δ-D</i> , <i>imr1L(Sn:ade6B)</i> , <i>imr1R(Sn:ade6X)</i> , <i>rad51::kanMX6</i>                                                        |
| TNF3452 | <i>h+</i> , <i>ade6Δ-D</i> , <i>imr1L(Sn:ade6B)</i> , <i>imr1R(Sn:ade6X)</i> , <i>rad54::kanMX6</i>                                                        |
| TNF3459 | <i>h+</i> , <i>ade6Δ-D</i> , <i>imr1L(Sn:ade6B)</i> , <i>imr1R(Sn:ade6X)</i> , <i>rad52::kanMX6</i>                                                        |
| TNF3631 | <i>h+</i> , <i>ade6Δ-D</i> , <i>ura4::ade6B-cen1(Sn-Sn)-ade6X</i>                                                                                          |
| TNF3635 | <i>h+</i> , <i>ade6Δ-D</i> , <i>ura4::ade6B-cen1(Sn-Sn)-ade6X</i> , <i>rad51::kanMX6</i>                                                                   |
| TNF3645 | <i>h+</i> , <i>ade6Δ-D</i> , <i>ura4::ade6B-cen1(Sn-Sn)-ade6X</i> , <i>rad54::kanMX6</i>                                                                   |
| TNF3643 | <i>h+</i> , <i>ade6Δ-D</i> , <i>ura4::ade6B-cen1(Sn-Sn)-ade6X</i> , <i>rad52::kanMX6</i>                                                                   |
| TNF3144 | <i>h+</i> , <i>ade6Δ-D</i> , <i>imr1L(Hp:ade6B)</i> , <i>imr1R(Hp:ade6X)</i>                                                                               |
| TNF3257 | <i>h+</i> , <i>ade6Δ-D</i> , <i>imr1L(Hp:ade6B)</i> , <i>imr1R(Hp:ade6X)</i> , <i>rad51::kanMX6</i>                                                        |
| TNF3286 | <i>h+</i> , <i>ade6Δ-D</i> , <i>imr1L(Hp:ade6B)</i> , <i>imr1R(Hp:ade6X)</i> , <i>rad54::kanMX6</i>                                                        |
| TNF3277 | <i>h+</i> , <i>ade6Δ-D</i> , <i>imr1L(Hp:ade6B)</i> , <i>imr1R(Hp:ade6X)</i> , <i>rad52::kanMX6</i>                                                        |
| TNF3650 | <i>h+</i> , <i>ade6Δ-D</i> , <i>ura4::ade6B-cen1(Hp-Hp)-ade6X</i>                                                                                          |
| TNF3664 | <i>h+</i> , <i>ade6Δ-D</i> , <i>ura4::ade6B-cen1(Hp-Hp)-ade6X</i> , <i>rad51::kanMX6</i>                                                                   |
| TNF3670 | <i>h+</i> , <i>ade6Δ-D</i> , <i>ura4::ade6B-cen1(Hp-Hp)-ade6X</i> , <i>rad54::kanMX6</i>                                                                   |
| TNF3667 | <i>h+</i> , <i>ade6Δ-D</i> , <i>ura4::ade6B-cen1(Hp-Hp)-ade6X</i> , <i>rad52::kanMX6</i>                                                                   |
| TNF3734 | <i>h+</i> , <i>ade6Δ-D</i> , <i>imr1L(Sn:ade6B)</i> , <i>imr1R(Sn:ade6X)</i> , <i>clr4::kanMX6</i>                                                         |
| TNF3550 | <i>h+</i> , <i>ade6Δ-D</i> , <i>imr1L(Hp:ade6B)</i> , <i>imr1R(Hp:ade6X)</i> , <i>clr4::kanMX6</i>                                                         |
| TNF4684 | <i>h+</i> , <i>ade6Δ-D</i> , <i>ura4+::cen1(imr1L(Sn:ade6B), imr1R(Sn:ade6X))</i>                                                                          |
| TNF5814 | <i>h+</i> , <i>ade6Δ-D</i> , <i>ura4+::cen1(imr1L(Sn:ade6B), imr1R(Sn:ade6X))</i> , <i>rad51::kanMX6</i>                                                   |
| TNF5826 | <i>h+</i> , <i>ade6Δ-D</i> , <i>ura4+::cen1(imr1L(Sn:ade6B), imr1R(Sn:ade6X))</i> , <i>rad54::kanMX6</i>                                                   |
| TNF5829 | <i>h+</i> , <i>ade6Δ-D</i> , <i>ura4+::cen1(imr1L(Sn:ade6B), imr1R(Sn:ade6X))</i> , <i>rad52::kanMX6</i>                                                   |
| TNF3736 | <i>h+</i> , <i>ade6Δ-D</i> , <i>imr1L(Sn:ade6B)</i> , <i>imr1R(Sn:ade6X)</i> , <i>cnp1-76</i>                                                              |
| TNF4656 | <i>h+</i> , <i>ade6Δ-D</i> , <i>imr1L(Sn:ade6B)</i> , <i>imr1R(Sn:ade6X)</i> , <i>mis16-53</i>                                                             |
| TNF5534 | <i>h+</i> , <i>ade6Δ-D</i> , <i>imr1L(Sn:ade6B)</i> , <i>imr1R(Sn:ade6X)</i> , <i>cnp20-M447T::kanMX6</i>                                                  |
| TNF4657 | <i>h+</i> , <i>ade6Δ-D</i> , <i>imr1L(Sn:ade6B)</i> , <i>imr1R(Sn:ade6X)</i> , <i>mis18-262</i>                                                            |
| TNF5376 | <i>h+</i> , <i>ade6Δ-D</i> , <i>imr1L(Sn:ade6B)</i> , <i>imr1R(Sn:ade6X)</i> , <i>mis14-271</i>                                                            |
| TNF4139 | <i>h+</i> , <i>ade6Δ-D</i> , <i>imr1L(Sn:ade6B)</i> , <i>imr1R(Sn:ade6X)</i> , <i>csm1::kanMX6</i>                                                         |
| TNF4115 | <i>h+</i> , <i>ade6Δ-D</i> , <i>imr1L(Sn:ade6B)</i> , <i>imr1R(Sn:ade6X)</i> , <i>cnp3::kanMX6</i>                                                         |
| TNF4779 | <i>h+</i> , <i>ade6Δ-D</i> , <i>imr1L(Sn:ade6B)</i> , <i>imr1R(Sn:ade6X)</i> , <i>mhf1::hphMX6</i>                                                         |
| TNF5082 | <i>h+</i> , <i>ade6Δ-D</i> , <i>imr1L(Sn:ade6B)</i> , <i>imr1R(Sn:ade6X)</i> , <i>mhf2::hphMX6</i>                                                         |
| TNF5353 | <i>h+</i> , <i>ade6Δ-D</i> , <i>imr1L(Sn:ade6B)</i> , <i>imr1R(Sn:ade6X)</i> , <i>fml1::hphMX6</i>                                                         |
| TNF5128 | <i>h+</i> , <i>ade6Δ-D</i> , <i>imr1L(Sn:ade6B)</i> , <i>imr1R(Sn:ade6X)</i> , <i>mhf1::hphMX6</i> , <i>fml1::kanMX6</i>                                   |
| TNF5444 | <i>h-</i> , <i>ade6Δ-D</i> , <i>imr1L(Sn:ade6B)</i> , <i>imr1R(Sn:ade6X)</i> , <i>mhf1-L78R</i>                                                            |
| TNF5455 | <i>h+</i> , <i>ade6Δ-D</i> , <i>ura4+::cen1(imr1L(Sn:ade6B), imr1R(Sn:ade6X))</i> , <i>mhf1-L78R</i>                                                       |
| TNF4806 | <i>h+</i> , <i>ade6Δ-D</i> , <i>ura4+::cen1(imr1L(Sn:ade6B), imr1R(Sn:ade6X))</i> , <i>fml1::hphMX6</i>                                                    |
| TNF3896 | <i>h-</i> , <i>smt0</i> , <i>ade6Δ-D</i> , <i>ura4-D18</i> , <i>leu1-32</i> , <i>ChL (ubcp4::LEU2+::chk1, spcc1322::ura4, ade6+)</i>                       |
| TNF5477 | <i>h-</i> , <i>smt0</i> , <i>ade6Δ-D</i> , <i>ura4-D18</i> , <i>leu1-32</i> , <i>ChL (ubcp4::LEU2+::chk1, spcc1322::ura4, ade6+)</i> , <i>mhf1-L78R</i>    |
| TNF4813 | <i>h-</i> , <i>smt0</i> , <i>ade6Δ-D</i> , <i>ura4-D18</i> , <i>leu1-32</i> , <i>ChL (ubcp4::LEU2+::chk1, spcc1322::ura4, ade6+)</i> , <i>fml1::hphMX6</i> |
| TNF5281 | <i>h+</i> , <i>ade6Δ-D</i> , <i>ura4+::cen1(imr1L(Sn:ade6B), imr1R(Sn:ade6X))</i> , <i>clr4::hphMX6</i>                                                    |
| TNF5464 | <i>h+</i> , <i>ade6Δ-D</i> , <i>ura4+::cen1(imr1L(Sn:ade6B), imr1R(Sn:ade6X))</i> , <i>fml1::hphMX6</i> , <i>clr4::kanMX6</i>                              |
| TNF35   | <i>h+</i>                                                                                                                                                  |
| TNF5485 | <i>h+</i> , <i>cnp20-M447T::kanMX6</i>                                                                                                                     |
| TNF3562 | <i>h+</i> , <i>ade6Δ-D</i> , <i>ade6B::ura4+::ade6X</i>                                                                                                    |
| TNF4186 | <i>h-</i> , <i>ade6Δ-D</i> , <i>ura4+::cen1(Sn:ade6B, imr1R(Sn:ade6X))</i> , <i>swi6::kanMX6</i>                                                           |
| TNF4226 | <i>h-</i> , <i>ade6Δ-D</i> , <i>ura4::cen1(Sn:ade6B, imr1R(Sn:ade6X))</i> , <i>swi6::kanMX6</i>                                                            |

Supplementary Table S2. PCR primers used in this study.

| Primer          | Sequence                              | Real-time PCR target |
|-----------------|---------------------------------------|----------------------|
| ade6-D-D-F      | 5' -GCTCGTACCGCAGCTTCAAG              | ade6                 |
| ade6-D-D-R      | 5' -GCAACCATACCAGGCAAATGA             | ade6                 |
| imr1-in-F       | 5' -ATTTCCGCTTACAAAATGCCA             | imr-in               |
| imr1-in-R       | 5' -TTTCTCAACAGCAAAGCCTGAA            | imr-in               |
| imr1-out-F      | 5' -GATGATATCGAGGCTTTCGGTTT           | imr-out              |
| imr1-out-R      | 5' -TGTCCCTTCTGTAAATTCTCGTGTA         | imr-out              |
| cnt1/3-F        | 5' -CAACCACTGAAAGCGAATCTGTA           | cnt1                 |
| cnt1/3-R        | 5' -ATTCTGTAAGTTTGCTGTGCTTTATATCA     | cnt1                 |
| adl1-F          | 5' -AAATATGGCGATCCAGGAGATG            | adl1                 |
| adl1-R          | 5' -GCTTAACGTGCGCACAGACA              | adl1                 |
| cnt2-F          | 5' -TGCCTCTCCCTTGCCAGTAA              | cnt2                 |
| cnt2-R          | 5' -TCGTTGCGGTGTTTTGAAA               | cnt2                 |
| dg-F            | 5' -TTGCACTCGGTTTCAGCTAT              | dg                   |
| dg-R            | 5' -TGCTCTGACTTGCTTGTCT               | dg                   |
| imr3-in2        | 5' -AAGTTTTGATGCTCAACAAATGGC          | n.a.                 |
| cnt3R           | 5' -CGGAATTAGAAAGATTGATGATTTG         | n.a.                 |
| cnt3L           | 5' -AACCGCAACAAACGATTAGC              | n.a.                 |
| irc3F-long      | 5' -CATTAAAAATCAACAAGTCTTGTCCGTC      | n.a.                 |
| irc3R-long      | 5' -ATAGAAACATTTTTGAGTGTTGTTTCAGG     | n.a.                 |
| cm-ade6         | 5' -TTGCTCCTCGGCCTCACAATTCAGG         | n.a.                 |
| NotI-NheI-otr1R | 5' -GGCGGCCGCTTCCAGCTTTTACATGCTAGCC   | n.a.                 |
| irc1R-BIpl      | 5' -GGGCTAAGCCAGATTAGATTTTCGGTGCGGTGC | n.a.                 |
| per1-Spe        | 5' -CCGTCTTCGTAAGTTCGCACTCACTG        | n.a.                 |
| otr-Bam         | 5' -GCAATTGGATCCGTAAATAGGCGAGATC      | n.a.                 |

n.a., not applicable.
